# Supplementary material
Source: PubMed Central journal article supplement (PMC2875830)

## Supplementary Material and Methods

### *Serum Biochemistry*

Serum glucose was measured using glucose oxidase method (Synermed, Westfield, IN). Serum triglycerides and NEFA levels were estimated using commercially available reagents (triglycerides, Synermed, Westfield, IN and NEFA C reagents, Wako Chemicals, Richmond, VA). Insulin and leptin concentrations in serum were assayed using ELISA (Linco Research, St. Charles, MO). Serum FGF21 concentrations were assayed using commercially available radioimmunoassay (Phoenix Pharmaceuticals, Burlingame, CA). Adiponectin and resistin were assayed using commercially available ELISA (B-Bridge International, Sunnyvale, CA).

### *Immunoblotting*

Total lysates from livers of offspring at PND21 (N = 6 per group) were prepared in RIPA buffer (25 mM Tris-HCl, 150 mM NaCl, 1% NP-40, 1% deoxycholic acid, 0.1% SDS and 2 mM EDTA) containing 1 mM PMSF and protease inhibitors (Sigma Chemicals). Nuclear proteins were prepared using NE-PER reagents (Thermo-Fisher, Rockford, IL). Hepatic mitochondrial protein was prepared using Mitochondrial Isolation Kit (Thermo Fisher). Proteins were resolved by SDS-PAGE and transferred to PVDF membranes. Immunoblotting was carried out using standard procedures. Membranes were incubated with rabbit or mouse anti-AMPK, pAMPK Thr<sub>172</sub>, ACC, IR- $\beta$ , IRS-1, pAKT Ser<sub>473</sub>, AKT (Cell Signaling Technologies, Danvers, MA); pAKT Thr<sub>308</sub> (Millipore); ERK1/2, pERK1/2 (Santa Cruz Biotech, Santa Cruz, CA); FASN (AbCam, Cambridge, MA); GAPDH, Lamin A (Sigma); or SREBP-1 (Novus Biologicals) antibody, overnight in TBST containing either 5% non-fat milk or BSA at 4 °C. Anti-CPT1a antibody was kindly provided by Dr. Victoria Esser (University of Texas Southwestern Medical

Center, Dallas, TX). Following incubation with HRP-conjugated secondary, membranes were washed and proteins visualized using ECL-plus reagent (GE Healthcare Biosciences, Piscataway, NJ). Densitometric quantitation was performed using Quantity One software (Biorad).

### ***Chromatin Immunoprecipitation Assay***

The ChIP-IT Enzymatic™ kit (Active Motif) was used with minor modifications for *in vivo* samples and described previously. Briefly, triplicate pooled liver samples (with each pool representing 2-3 separate animals) were cross-linked in 37% formalin for 10 min. Cross-linking was stopped by adding glycine stop-fix solution (3 ml 10X glycine buffer; 3 ml 10X phosphate-buffered saline and 24 ml water). Nuclei were isolated by homogenizing the fixed liver tissue, followed by centrifugation at 1500 g for 15 min at 4 °C. Enzymatic shearing was carried out using recommended conditions and consistency of shearing was ascertained by electrophoresis on purified DNA on 1.5% agarose. Aliquots of sheared chromatin were incubated with 5 µg of either anti-SREBP-1 (Novus Biologicals), anti-PPAR-α (Abcam) or anti-rabbit or anti-mouse IgG, respectively. Chromatin-bound transcription factor immune complexes were collected using magnetic protein G beads. The yield of specific promoter target sequences was analyzed by PCR. SREBP-1 recruitment was assessed by amplifying the 353 bp region (from -288 bp to +65 of the transcription start site) of the FASN promoter (forward primer, 5'-GAGATGAGGGCGTCGGGAT-3'; reverse primer, 5'-TGGAGGCAGACGACAAGCGA-3'). PPAR-α recruitment to the FGF21 promoter was monitored by amplifying the 112 bp region (from -1434 bp to -1322 of the transcription start site) of the FGF21 promoter (forward primer, 5'-AGCACAGGACCTGAATGCTAAAC-3'; reverse primer, 5'-GCTGCATCAGCCTCCTGTAAG-3') enclosing the distal PPRE.

## LEGENDS FOR SUPPLEMENTARY TABLES AND FIGURES

**Sup Table 1: Primers Sequences for Real-time RT-PCR Analyses** Gene specific primers were designed using Primer Express™ Software (Applied Biosystems, Foster city, CA). Real-time PCR reactions were carried out according to manufacturer's instructions for 2X SYBR green master mix and monitored on a ABI Prism 7000 sequence detection system (Applied Biosystems, Foster city, CA) as described under methods.

**Sup Table 2: Maternal Overweight-Induced Changes in Hepatic Gene Expression of Offspring Liver at Weaning.** Gene expression was assessed in offspring liver at PND21 using Rat Genome 230 2.0 microarrays (Affymetrix). Microarray data analyses were carried out using GeneSpring version 7.3X software. The normalized data was utilized to generate list of differentially expressed genes between offspring of OW and lean dams at PND21. Genes were filtered based on minimum  $\pm 1.8$ -fold change (OW vs. lean) and P value  $\leq 0.05$  using Student's t-test. Abbreviations for gene symbols can be queried from the NetAffx™ Data Analyses Center (<http://www.affymetrix.com/analysis/index.affx>).

**Sup Fig 1. (A)** Body weights of female rats fed liquid diets via total enteral nutrition (TEN) at 155 Kcal/kg<sup>3/4</sup>/d (Lean) or 220 Kcal/kg<sup>3/4</sup>/d (overweight, OW, N = 18 per group) for 3 wk. Infusion of diets was carried out for 23 h/d via computer controlled syringe pumps. **(B)** Body composition analyses (N = 8 per group) of rats estimated non-invasively by NMR analyses (ECHO MRI) at 3 wk. Fat mass and lean mass expressed as percentage of body weight. **(C)** Body weight of female rats through gestation fed liquid diets via TEN. Data are expressed as

means  $\pm$  SEM. Statistical differences were determined using a Student's t-test. Differing superscripts or \* indicates  $p < 0.05$ .

**Sup Fig 2. Hierarchical Clustering of Gene Expression Profiles** Global condition clustering of all transcripts on the Rat 230 2.0 GeneChip showing distinct clustering among offspring based on maternal phenotype (lean or OW).

**Sup Fig 3. (A)** Pie chart of gene ontology based on molecular function of 147 differentially expressed transcripts in liver of offspring from lean or OW dams at PND21. Genes were filtered based on minimum  $\pm 1.8$ -fold change (OW vs. Lean) and P value  $\leq 0.05$  using Student's t test. Numbers represent the number of transcripts in each category.

**SUPPLEMENTARY TABLE 1 Primers Sequences for Real-time RT-PCR Analyses**

| <b>Gene Name</b>                 | <b>Forward primer (5'- 3')</b> | <b>Reverse primer (5'- 3')</b> |
|----------------------------------|--------------------------------|--------------------------------|
| <b>ACC-<math>\alpha</math></b>   | GTCTCTTTCCGGACCTTTGAAG         | ATAGAGTGAAGTGTGACCCGGACTCT     |
| <b>ACLY</b>                      | GTCAGCCAAGGCAATTCAGAG          | TAACCCGGGCATACTTGAACC          |
| <b>Acot-1</b>                    | GAATTGGGCTGCTTGGGATT           | CACGGAGCCATTGATGACAAC          |
| <b>Adiponutrin</b>               | GGGAGAACGTGCTGGTGTCT           | AGGAGGGATTAGGCCAGAGAAG         |
| <b>Adiponectin</b>               | GCGTCACTGTCCCCAATGTT           | CGGAATGTTGCAGTGGAATTT          |
| <b>AdipoR1</b>                   | CTGACTGGCTGAAAGACAATGACT       | TTCTGTGTGGATGCGGAAGAT          |
| <b>AdipoR2</b>                   | TCCCAAGAAGATGAAGGGTTTATG       | CGACCTTCCCACACCTTACAA          |
| <b>Cyp4a</b>                     | CACTCCCGTGTGAGGAACATC          | TGATCATGGGCAAGTTGACAA          |
| <b>Cpt-1a</b>                    | AGCGTTCTTCGTGACGTTGG           | TCCATGCAGCAGGGATTTG            |
| <b>Cyclophilin A</b>             | AAGCATAACAGGTCCTGGCATCT        | TGCCATCCAGCCACTCAGT            |
| <b>ELOVL6</b>                    | AACGAGAACGAAGCCATCCA           | ATCAGATGCCGACCACCAA            |
| <b>FABP5</b>                     | GCCAAACCAGACTGCATCATT          | TTCTCTCCAAGGTGCAAGAA           |
| <b>FASN</b>                      | CGCCGACCAGTATAAACCCAA          | TCACCCTCAATGATGTGCACA          |
| <b>FGF21</b>                     | CACACCGCAGTCCAGAAAGTC          | TGGTTGTTGGCAAAGAAACCTA         |
| <b>G6PD</b>                      | GAGACTTCAGTCCGCGATGT           | TGGTGTATACCGCCTCATTGG          |
| <b>Insig-1</b>                   | AGAGAGAGTGGGCCAGTGTC           | CAGGGACAGCTGCACATTATTG         |
| <b>Malic enzyme</b>              | TGCAATTGGTGGTGCTTTCA           | TCAGCTTTGCTGGTCGGATTA          |
| <b>Mte1</b>                      | GAATTGGGCTGCTTGGGA             | CACGGAGCCATTGATGACAAC          |
| <b>PPAR-<math>\alpha</math></b>  | ACGATGCTGTCCCTCCTTGATG         | CAGAATGGCTTCCTCAGGTTCT         |
| <b>PPAR-<math>\gamma</math>2</b> | AAACTCTGGGAGATCCTCCTGTT        | GCATCTCTGTGTCAACCATGGT         |
| <b>Pxmp4</b>                     | CTGCAGGCCATTCTGAAAGC           | CACCTTGCACATGGGACTGTA          |
| <b>SREBP-1</b>                   | CAAGTGCTGCAGGAAACTG            | GGCTGGATTCCACCTTTCTGT          |
| <b>Trib3</b>                     | GCCTATCAGCCTCTGCTCGAT          | CCTCCCTCAACCAGGGATGTA          |
| <b>Vnn1</b>                      | ATCCTGCCTAAAGTCACCCTGTTA       | GCTGCTGATAAGATCGCTCCTT         |

Gene specific primers were designed using Primer Express™ Software (Applied Biosystems, Foster city, CA). Real-time PCR reactions were carried out according to manufacturer's instructions for 2X SYBR green master mix and monitored on a ABI Prism 7000 sequence detection system (Applied Biosystems, Foster city, CA) as described under methods.

**SUPPLEMENTARY TABLE 2 Maternal Overweight-Induced Changes in Hepatic Gene Expression of Offspring Liver at Weaning via Microarray Analyses**

| Identifier                     | Gene Symbol      | Description                                | Ratio OW vs lean |
|--------------------------------|------------------|--------------------------------------------|------------------|
| <b>Carbohydrate Metabolism</b> |                  |                                            |                  |
| 1391544_at                     | Adpn             | Similar to adiponutrin                     | 18.39            |
| 1367854_at                     | Acly             | ATP citrate lyase                          | 3.74             |
| 1370281_at                     | Fabp5            | fatty acid binding protein 5, epidermal    | 2.58             |
| 1387643_at                     | Fgf21            | fibroblast growth factor 21                | 0.24             |
| 1367856_at                     | G6pd             | glucose-6-phosphate dehydrogenase          | 2.01             |
| 1387312_a_at                   | Gck              | glucokinase                                | 0.36             |
| 1367894_at                     | Insig1           | insulin induced gene 1                     | 2.44             |
| 1370870_at                     | Me1              | malic enzyme 1                             | 2.04             |
| 1387670_at                     | mtGPDH           | glycerol-3-phosphate dehydrogenase 2       | 0.52             |
| 1371646_at                     | PGD              | phosphogluconate dehydrogenase             | 2.50             |
| 1387263_at                     | Pklr             | pyruvate kinase, liver and RBC             | 2.26             |
| 1368460_at                     | Slc2a5           | solute carrier family 2, member 5          | 1.96             |
| 1370694_at                     | Trib3            | tribbles homolog 3 (Drosophila)            | 0.44             |
| <b>Lipid Biosynthesis</b>      |                  |                                            |                  |
| 1387538_at                     | Acaca            | acetyl-coenzyme A carboxylase alpha        | 4.02             |
| 1373778_at                     | Acc2             | Acetyl-Coenzyme A carboxylase beta         | 1.93             |
| 1372462_at                     | Acat2            | similar to acetyl CoA transferase-like     | 3.38             |
| 1368177_at                     | Acs13            | acyl-CoA synthetase long-chain 3           | 1.88             |
| 1375944_at                     | Acss             | Acyl-CoA synthetase short-chain 2          | 2.25             |
| 1388108_at                     | Elovl6           | ELOVL family member 6                      | 2.65             |
| 1375782_at                     | Fads1            | Fatty acid desaturase 1                    | 1.89             |
| 1367708_a_at                   | Fasn             | fatty acid synthase                        | 5.11             |
| 1371104_at                     | Srebf1           | sterol regulatory element binding factor 1 | 2.70             |
| 1387852_at                     | Thrsp            | thyroid hormone responsive protein         | 2.98             |
| <b>Lipid Metabolism</b>        |                  |                                            |                  |
| 1398250_at                     | Cte1             | cytosolic acyl-CoA thioesterase 1          | 0.31             |
| 1371886_at                     | Crat             | carnitine acetyltransferase                | 0.50             |
| 1386946_at                     | Cpt1a            | carnitine palmitoyltransferase 1, liver    | 0.47             |
| 1370397_at                     | Cyp4a14          | cytochrome P450, 4a14                      | 0.41             |
| 1368934_at                     | Cyp4a10          | cytochrome P450, 4a10                      | 0.39             |
| 1367659_s_at                   | Dci              | dodecenoyl-coenzyme A delta isomerase      | 0.42             |
| 1386885_at                     | Ech1             | enoyl coenzyme A hydratase 1, peroxisomal  | 0.46             |
| 1388210_at                     | Mte1             | mitochondrial acyl-CoA thioesterase 1      | 0.51             |
| 1377049_at                     | Ntel1            | NTE-related protein                        | 0.51             |
| 1371012_at                     | Phy2             | 2-hydroxyphytanoyl-Coenzyme A lyase        | 0.46             |
| <b>Electron Transport</b>      |                  |                                            |                  |
| 1370241_at                     | Cyp2c7           | cytochrome P450, 2c7                       | 0.45             |
| 1369424_at                     | Cyp2a2           | cytochrome P450, 2a1                       | 2.70             |
| 1369666_at                     | Gpd2             | Glycerol-3-phosphate dehydrogenase 2       | 0.48             |
| 1384355_at                     | Plxna2_predicted | plexin A2                                  | 1.83             |

| Identifier                                    | Gene Symbol          | Description                                        | Ratio OW vs Lean |
|-----------------------------------------------|----------------------|----------------------------------------------------|------------------|
| <b>Cholesterol Metabolism &amp; Transport</b> |                      |                                                    |                  |
| 1369455_at                                    | Abcg5                | ATP-binding cassette, G5                           | <b>0.50</b>      |
| 1387020_at                                    | Cyp51                | cytochrome P450, subfamily 51                      | <b>1.80</b>      |
| 1368458_at                                    | Cyp7a1               | cytochrome P450, 7a1                               | <b>0.39</b>      |
| 1368435_at                                    | Cyp8b1               | cytochrome P450, 8b1                               | <b>0.45</b>      |
| 1368189_at                                    | Dhcr7                | 7-dehydrocholesterol reductase                     | <b>2.69</b>      |
| 1368086_a_at                                  | Lss                  | lanosterol synthase                                | <b>1.99</b>      |
| 1367667_at                                    | Fdps                 | faranyl diphosphate synthase                       | <b>2.05</b>      |
| 1387233_at                                    | Hsd17b7              | 17- $\beta$ Hydroxysteroid dehydrogenase 7         | <b>1.88</b>      |
| 1388872_at                                    | Idi1                 | Isopentenyl-diphosphate delta isomerase            | <b>2.12</b>      |
| <b>Metabolic Processes</b>                    |                      |                                                    |                  |
| 1368826_at                                    | Comt                 | catechol-O-methyltransferase                       | <b>2.30</b>      |
| 1388210_at                                    | Mte1                 | mitochondrial acyl-CoA thioesterase 1              | <b>0.51</b>      |
| 1371697_at                                    | Pnpla2_predicted     | similar to RIKEN cDNA 0610039C21 (predicted)       | <b>0.50</b>      |
| 1383117_at                                    | Pxmp4                | peroxisomal membrane protein 4                     | <b>0.31</b>      |
| 1377037_at                                    | RGD1564089_predicted | peroxisomal long chain acyl-CoA thioesterase Ia    | <b>0.45</b>      |
| 1379361_at                                    | Pex11a               | peroxisomal biogenesis factor 11A                  | <b>0.50</b>      |
| 1377672_at                                    | Sult1c2              | sulfotransferase family, 1c2, cytosolic            | <b>0.47</b>      |
| 1370943_at                                    | Sult1c2a             | sulfotransferase family, 1c1, cytosolic            | <b>0.53</b>      |
| 1368733_at                                    | Ste                  | sulfotransferase, estrogen preferring              | <b>3.05</b>      |
| 1372120_at                                    | Ube1dc1              | ubiquitin-activating enzyme E1-domain containing 1 | <b>0.51</b>      |

# Supplementary Figure 1

## Body weight and Body Composition of Female Rats Prior to and during Gestation

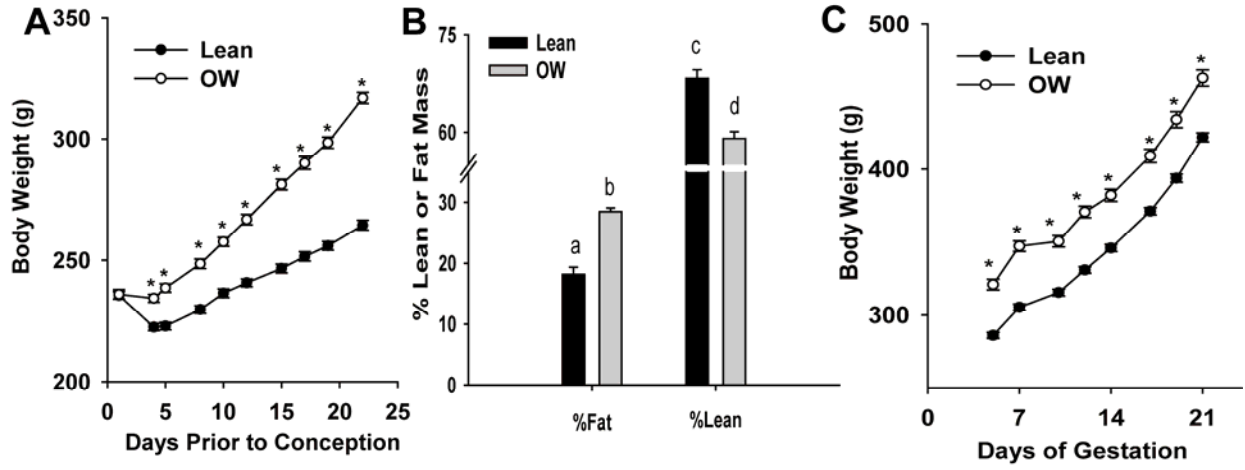



**Supplementary Figure 2**  
**Condition Clustering of Gene Expression Profiles**

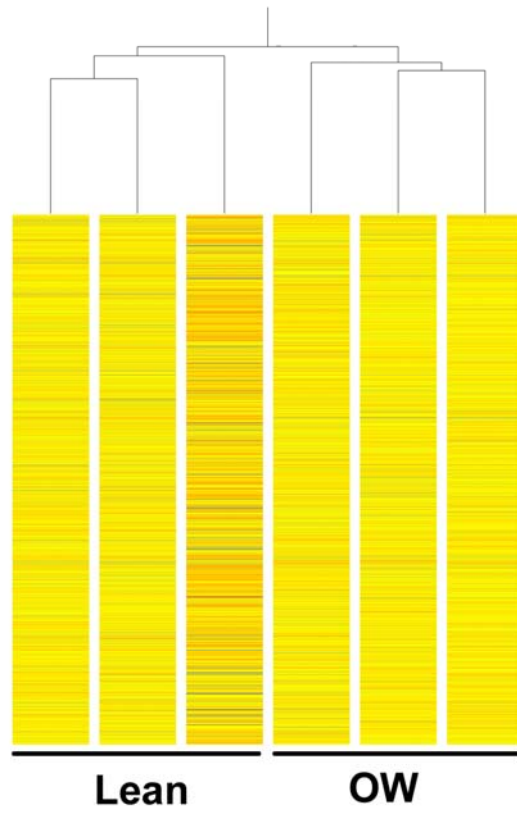

**Supplementary Figure 3**  
**Condition Clustering of Gene Expression Profiles**

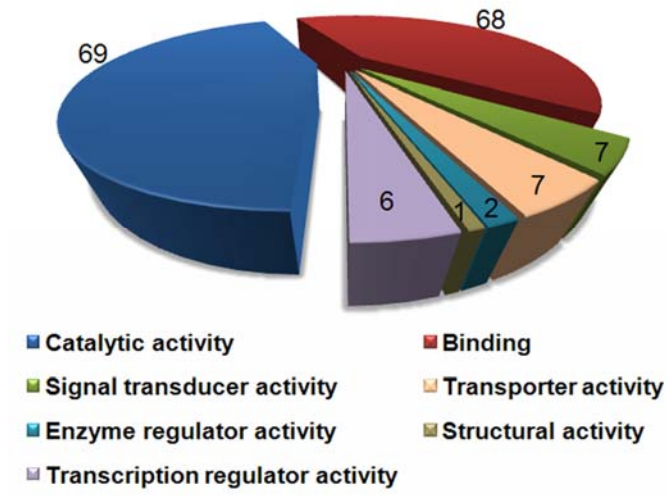

Supplement: en.2010-0017_1.pdf [file en.2010-0017_1.pdf]
